# Supplementary material for: New Properties of a Bioinspired Pyridine Benzimidazole Compound as a Novel Differential Staining Agent for Endoplasmic Reticulum and Golgi Apparatus in Fluorescence Live Cell Imaging
Source: PubMed Central journal article supplement (PMC6123694; doi:10.3389/fchem.2018.00345), 2018-08-15
Supplement: Table_1.pdf [file Table_1.pdf]

## SUPPLEMENTARY TABLES

**Table S1.** Characteristic constants of phenyl-3,5-di-tert-butyl-2-hydroxibenzoate\* and **B1**.

| Compound                                    | Molecular formula                                             | MW (g mol <sup>-1</sup> ) | Melting point (°C) | Solid color | TLC R <sub>f</sub> |
|---------------------------------------------|---------------------------------------------------------------|---------------------------|--------------------|-------------|--------------------|
| <b>B2</b>                                   | C <sub>20</sub> H <sub>25</sub> N <sub>3</sub> O              | <b>323,4320</b>           | 311-312            | Light brown | 0.38               |
| phenyl-3,5-di-tert-butyl-2-hydroxibenzoate* | C <sub>21</sub> H <sub>26</sub> N <sub>3</sub> O <sub>3</sub> | <b>365,4256</b>           | ND                 | White       | 0.80               |

MW: Molecular weight

TLC: Thin layer chromatography, using ethyl acetate as solvent

ND: not determined

\* Precursor for **B2** synthesis

**Table S2.** UV-Vis absorption spectra of **B2** in different organic solvents at room temperature.

| Compound  | Chloroform    |            | Acetonitrile  |            | DMSO          |            |
|-----------|---------------|------------|---------------|------------|---------------|------------|
|           | $\lambda$ exp | $\epsilon$ | $\lambda$ exp | $\epsilon$ | $\lambda$ exp | $\epsilon$ |
| <b>B2</b> | 332           | 13.32      | 327           | 12.91      | 332           | 11.30      |
|           | 294           | 19.09      | 292           | 18.67      | 294           | 15.44      |
|           | 284           | 15.51      | 282           | 14.88      | 284           | 12.23      |

$\lambda$  is in nm

$\epsilon$  is in mol<sup>-1</sup> dm<sup>3</sup> cm<sup>-1</sup>

**Table S3.** Scan-rate study for determining diffusional control of described electrochemical processes at **B2**.

| Process                                       | Scan-rate<br>vs<br>current-<br>density<br>peak | (Scan-<br>rate) <sup>1/2</sup> vs<br>current-<br>density<br>peak | Diff.<br>control?    | Process              | Scan-rate<br>vs<br>current-<br>density<br>peak | (Scan-<br>rate) <sup>1/2</sup> vs<br>current-<br>density<br>peak | Diff.<br>control?    |
|-----------------------------------------------|------------------------------------------------|------------------------------------------------------------------|----------------------|----------------------|------------------------------------------------|------------------------------------------------------------------|----------------------|
|                                               | <b>m</b>                                       | <b>n</b>                                                         | <b>R<sup>2</sup></b> |                      | <b>m</b>                                       | <b>n</b>                                                         | <b>R<sup>2</sup></b> |
| Red <sup>I</sup> <sub>(rev)</sub>             | -5.3×10 <sup>5</sup>                           | -2.2×10 <sup>2</sup>                                             | 0.833                | -2.1×10 <sup>4</sup> | -3.2                                           | 0.921                                                            | yes                  |
| O <sub>X</sub> <sup>I</sup> <sub>(irr)</sub>  | 9.5×10 <sup>5</sup>                            | 3.6×10 <sup>2</sup>                                              | 0.989                | 3.5×10 <sup>4</sup>  | -7.5                                           | 0.999                                                            | yes                  |
| O <sub>X</sub> <sup>II</sup> <sub>(irr)</sub> | 2.4×10 <sup>5</sup>                            | 1.1×10 <sup>2</sup>                                              | 0.961                | 8.9×10 <sup>3</sup>  | 1.5                                            | 0.996                                                            | yes                  |

“m”, “n” and “R<sup>2</sup>” are the slope, intercept and linear regression coefficient, respectively.

The scan-rate study provides a fast determination of the nature of electrochemical processes, allowing a differentiation between processes controlled by mass-transport (diffusion) from others. For each identified process for **B2**, several cyclic voltammetry runs must be recorded at different scan rates. Thus, two plots must be constructed, an “Scan-rate vs current-density peak” and a “(Scan-rate)<sup>1/2</sup> vs current density peak” for each reduction an oxidation identified in the system (see **Table S3**).

**Table S4.** Results for the geometry optimization of the ground ( $S_0$ ) and first excited singlet ( $S_1$ ) state.

| <b>Compound</b> | <b>d(N-H)</b> | <b>d(O-H)</b> |
|-----------------|---------------|---------------|
| $S_0$           | 1.731         | 0.989         |
| $S_1$           | 1.673         | 1.006         |

**Table S5.** The most important absorption and emission bands for **B2** in DMSO.

|                   | $\lambda$ (nm) | $f^*$                | Assignment                                                |
|-------------------|----------------|----------------------|-----------------------------------------------------------|
| <b>Absorption</b> | 271.8          | $1.1 \times 10^{-2}$ | HOMO-2 $\rightarrow$ LUMO+1<br>(n $\rightarrow$ $\pi^*$ ) |
|                   | 293.4          | $1.2 \times 10^{-2}$ | HOMO-1 $\rightarrow$ LUMO<br>( $\pi \rightarrow \pi^*$ )  |
|                   |                | $1.4 \times 10^{-1}$ | HOMO $\rightarrow$ LUMO<br>( $\pi \rightarrow \pi^*$ )    |
| <b>Emission</b>   | 514.8          | $6.5 \times 10^{-3}$ | LUMO $\rightarrow$ HOMO<br>( $\pi^* \rightarrow \pi$ )    |

\*The oscillator strength was obtained using COSMO for DMSO as solvent.
